# Supplementary material for: Therapeutic treatment with an oral prodrug of the remdesivir parental nucleoside is protective against SARS-CoV-2 pathogenesis in mice
Source: PubMed Central journal article supplement (PMC8995034; doi:10.1126/scitranslmed.abm3410), 2022-03-22
Supplement: scitranslmed.abm3410_sm.pdf [file scitranslmed.abm3410_sm.pdf]

Supplementary Materials for

**Therapeutic treatment with an oral prodrug of the remdesivir parental nucleoside is protective against SARS-CoV-2 pathogenesis in mice**

Alexandra Schäfer *et al.*

Corresponding author: Timothy P. Sheahan, sheahan@email.unc.edu

DOI: 10.1126/scitranslmed.abm3410

**The PDF file includes:**

Figs. S1 to S5  
Tables S1 and S2

**Other Supplementary Material for this manuscript includes the following:**

MDAR Reproducibility Checklist  
Data file S1

A

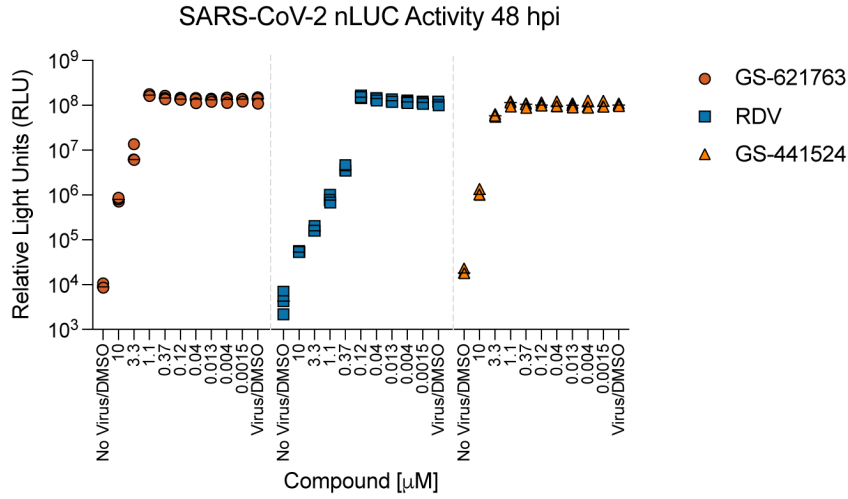

B

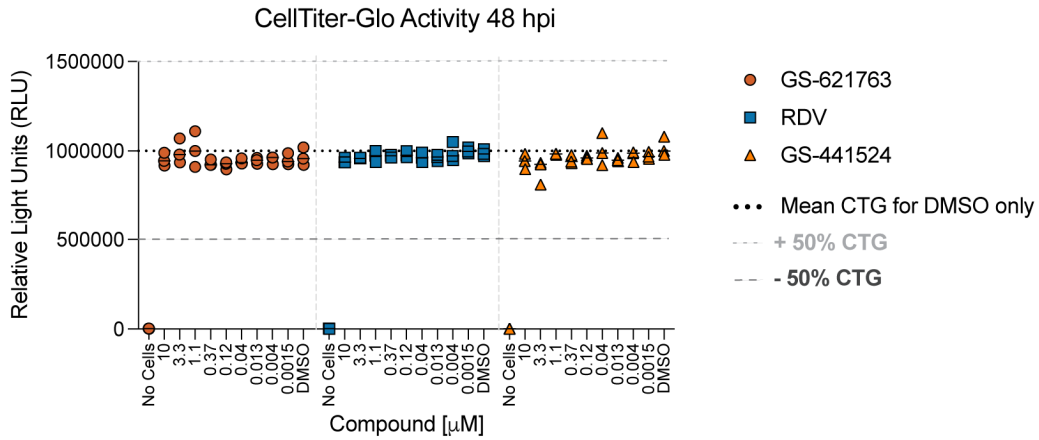

C

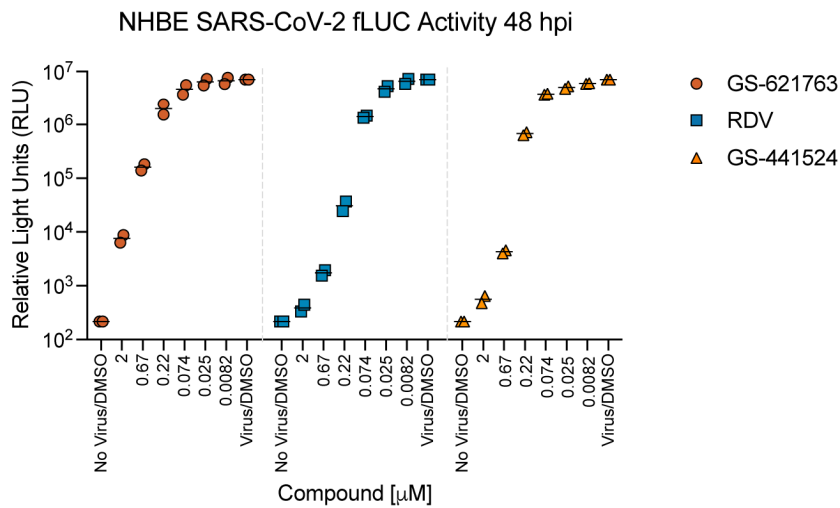

**Fig. S1. In vitro potency and cytotoxicity of GS-621763, Remdesivir (RDV), and GS-441524 in A549 cells expressing human angiotensin converting enzyme 2**

**(A549-hACE2 cells).** **(A)** Raw data are shown for the inhibition of SARS-CoV-2 replication by GS-621763, RDV, and GS-441521 in A459-hACE2 cells measured through quantitation of SARS-CoV-2 expressed nano luciferase (nLUC); data were analyzed in triplicate. **(B)** Raw data are shown for cytotoxicity in A459-hACE2 cells treated with GS-621763, RDV, and GS-441521. Cytotoxicity was measured using a CellTiter-Glo (CTG) assay and was measured in triplicates. **(C)** Raw data are shown for the inhibition of SARS-CoV-2-fLUC replication by GS-621763, RDV, and GS-441521 in normal human bronchial epithelial cultures measured through quantitation of SARS-CoV-2 expressed firefly luciferase (fLUC); data were measured in duplicates and the experiment was repeated twice.

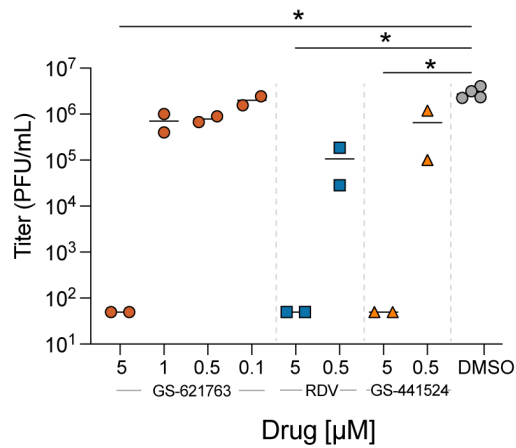

**Fig. S2. GS621763 treatment reduces viral titers in primary human airway epithelial cell cultures.**

Human airway epithelial cell cultures were treated with different doses of GS-621763, GS-441524, RDV, or DMSO and then infected with SARS-CoV-2 at an MOI of 0.5. Treatments were administered in duplicate. After 2 hours of infection, input virus was removed, cultures were washed once, and infectious virus titers in plaque forming units (PFU) was measured in apical washes after 72 hours. Each symbol represents the virus titer in a duplicate culture. Horizontal bars indicate median values. \* indicates  $p < 0.05$  as determined by Kruskal-Wallis test with Dunn's post test.

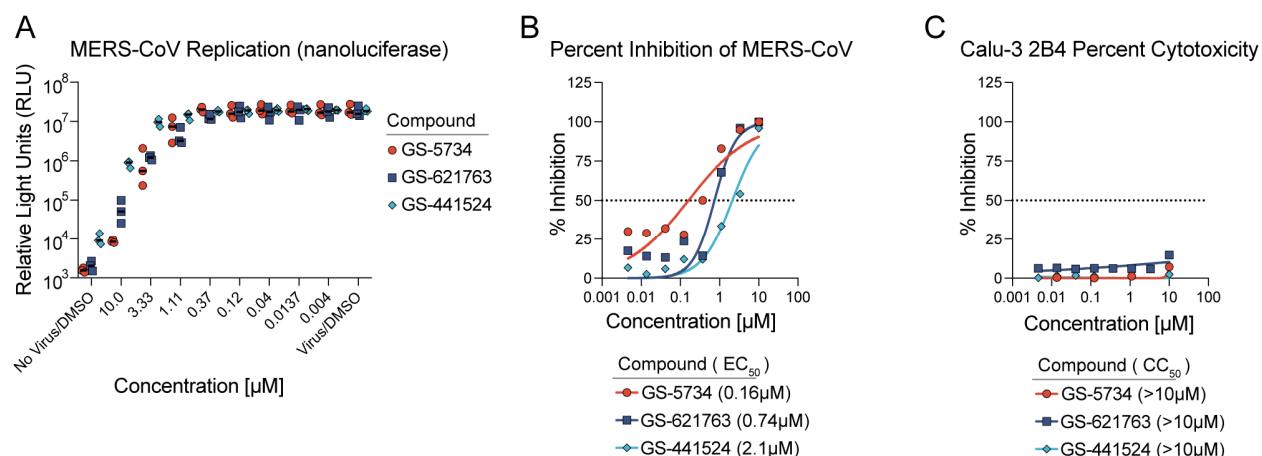

**Fig. S3. Antiviral activity of GS-621763 against Middle East Respiratory Syndrome CoV (MERS-CoV).**

Calu-3 2B4 cells were infected in triplicate with MERS-CoV-nLUC at a multiplicity of infection (MOI) of 0.008 in the presence of varying concentrations of indicated drug for 48 hours, after which replication was measured through quantitation of MERS-CoV-expressed nLUC. **(A)** MERS-CoV nanoluciferase (nLUC) activity was measured in Calu-3 2B4 cells treated with a dose response of GS-621763, GS-441524, or RDV. **(B)** Mean percent inhibition of MERS-CoV replication by RDV, GS-621763, or GS-441624 is shown. The horizontal line at 50% indicates the half-maximum effective concentration ( $EC_{50}$ ). **(C)** Cytotoxicity was measured in non-infected Calu-3 2B4 cells treated similarly to that in (A). Viability was measured using a CellTiter-Glo assay. The horizontal line at 50% indicates the 50% cytotoxic concentration ( $CC_{50}$ ). Data shown are representative of two independent experiments.

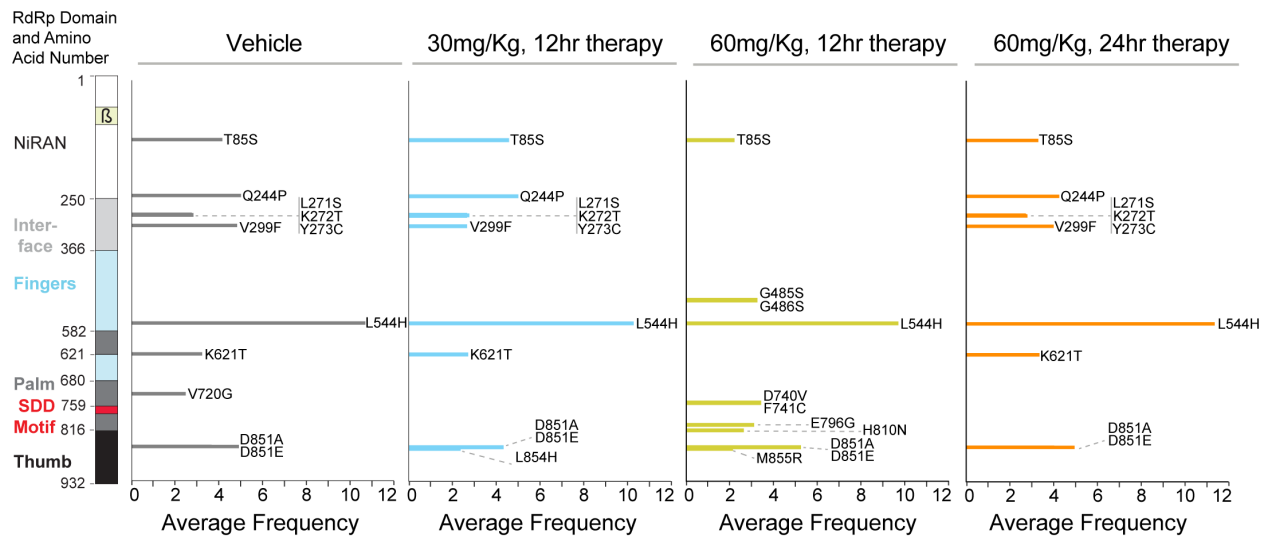

**Fig. S4. Identity and frequency of non-synonymous changes in the SARS-CoV-2 RNA-dependent RNA polymerase (RdRp).**

Deep sequencing is shown for total RNA utilized for reverse transcription quantitative polymerase chain reaction (Fig. 3C) from animals in the 30 mg/kg or 60 mg/kg quaque die (QD) GS-621763 treatment groups at 12 and 24 hours post-infection (n=3 or 4, respectively, for each sequenced group). The mutation locations are plotted onto the linear amino acid sequence of RdRp (y-axis). Major RdRp functional domains are noted including: nidovirus RdRp-associated nucleotidyltransferase (NiRAN), the N-terminal beta hairpin ( $\beta$ ), the interface domain connecting NiRAN to the main polymerase domain comprised of subdomains fingers, palm and thumb. The serine, aspartic acid, aspartic acid (SDD) catalytic site motif of the polymerase is noted. Sequencing was done to determine the identity and frequency of non-synonymous changes in RdRp. All mice were infected with  $1 \times 10^4$  PFU SARS-CoV-2 MA10.

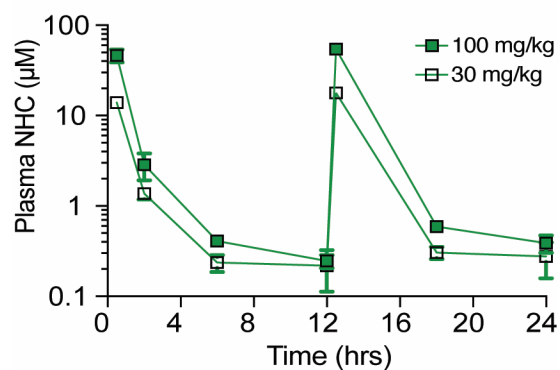

**Fig. S5. Molnupiravir mouse plasma pharmacokinetics.**

Plasma pharmacokinetics of N-hydroxycytidine (NHC) in uninfected BALB/c mice are shown following daily oral administration of molnupiravir at either 60 or 200 mg/kg (as either 30 or 100 mg/kg/dose given BID). Data are presented as mean $\pm$ SD.

**Table S1. Number of nucleotide changes in the SARS-CoV-2 genome in lung samples isolated from animals with infectious virus on 4 dpi.**

| <b>Group</b>        | <b>Animal ID</b> | <b># Nucleotide Changes</b> |
|---------------------|------------------|-----------------------------|
| Vehicle             | 1-2              | 152                         |
| Vehicle             | 1-4              | 199                         |
| Vehicle             | 2-1              | 184                         |
| Vehicle             | 2-4              | 195                         |
| 30mg/kg,<br>QD 12hr | 5-1              | 172                         |
| 30mg/kg,<br>QD 12hr | 5-3              | 154                         |
| 30mg/kg,<br>QD 12hr | 5-4              | 204                         |
| 60mg/kg,<br>QD12hr  | 7-2              | 181                         |
| 60mg/kg,<br>QD 12hr | 7-5              | 182                         |
| 60mg/kg,<br>QD 12hr | 8-3              | 289                         |
| 60mg/kg,<br>QD 24hr | 11-2             | 157                         |
| 60mg/kg,<br>QD 24hr | 11-4             | 164                         |
| 60mg/kg,<br>QD 24hr | 12-3             | 148                         |
| 60mg/kg,<br>QD 24hr | 12-4             | 116                         |





| 60mg/kg; QD, 12pi |       |          |              |        |     | 60mg/kg; QD, 24hpi |              |        |        |
|-------------------|-------|----------|--------------|--------|-----|--------------------|--------------|--------|--------|
| Position          | Codon | Change   | Codon Change | A.A.   | Avg | Change             | Codon Change | A.A.   | Avg    |
| 13693             | 85    | A -> T   | ACA -> TCA   | T -> S | 2.2 | A -> T             | ACA -> TCA   | T -> S | 2.675  |
| 13711             | 91    | A -> T   |              |        | 2.1 |                    |              |        |        |
| 13761             | 107   | C -> T   | GAC -> GAT   |        | 2.5 |                    |              |        |        |
| 14111             | 224   |          |              |        |     | A -> C             | CAA -> CCA   | Q -> P | 3.625  |
| 14252             | 271   |          |              |        |     | T -> C             | UUA -> UCA   | L -> S | 2.1    |
| 14255             | 272   |          |              |        |     | A -> C             | AAA -> ACA   | K -> T | 2.125  |
| 14258             | 273   |          |              |        |     | A -> G             | UAU -> UGU   | Y -> C | 2.175  |
| 14335             | 299   |          |              |        |     | G -> T             | GUU -> TUU   | V -> F | 3.375  |
| 14893             | 485   | G -> A   | GGU -> AGU   | G -> S | 3.1 |                    |              |        |        |
| 14896             | 486   | G -> A   | GGC -> AGC   | G -> S | 3.3 |                    |              |        |        |
| 15071             | 544   | T -> A   | CUU -> CAU   | L -> H | 9.7 | T -> A             | CUU -> CAU   | L -> H | 10.725 |
| 15302             | 621   |          |              |        |     | A -> C             | AAA -> ACA   | K -> T | 2.725  |
| 15599             | 720   |          |              |        |     |                    |              |        |        |
| 15659             | 740   | A -> T   | GAC -> GTC   | D -> V | 2.4 |                    |              |        |        |
| 15662             | 741   | T -> G   | UUU -> UGU   | F -> C | 3.4 |                    |              |        |        |
| 15827             | 796   | A -> G   | GAA -> GGA   | E -> G | 3.1 |                    |              |        |        |
| 15868             | 810   | C -> A   | CAU -> AAU   | H -> N | 2.6 |                    |              |        |        |
| 15992             | 851   | AT -> CC | GAU -> GCC   | D -> A | 3.6 | AT -> CC           | GAU -> GCC   | D -> A | 3.4    |
| 15993             | 851   | T -> A   | GAU -> GAA   | D -> E | 5.2 | T -> A             | GAU -> GAA   | D -> E | 4.325  |
| 16001             | 854   |          |              |        |     |                    |              |        |        |
| 16004             | 855   | T -> G   | AUG -> AGG   | M -> R | 2.1 |                    |              |        |        |
| 16164             | 908   | T -> A   | ACU -> ACA   |        | 2.9 |                    |              |        |        |
